# Supplementary material for: The risks of extreme load extrapolation
Source: Copernicus journal article supplement (doi:10.5194/wes-2017-12), 2017-03-14
Supplement: Supplementary file [file wes-2017-12-AC2-supplement.pdf]

Thank you for your comments and suggestions. They have certainly helped us to prepare a new version of the manuscript.

1. What is the procedure for obtaining the 50-year load from the data? There is some uncertainty associated with this value, and the authors should attempt to estimate it (for example, from a bootstrap procedure).

The 50-year load is obtained from a GEV fit to the tail. We have clarified that in the new version. We have also estimated the 95% confidence level around the 50-year value by bootstrapping (13.1-17.2 MN m with a median at 115.0 MN m), and have added it in the new version.

2. It is not clear how the results might differ should one choose a different distribution other than GEV for the fit. While an exhaustive study of many possible distributions is not required, some discussion and exploration of this is in order

In the new version, we have explored some different approaches to the extrapolation problem, including a Gumbel fit. This is more robust and forgiving at small sample sizes, but requires one to assume log-linear behavior in the tail.
